# Supplementary material for: Preparation of a novel core-shell nanostructured gold colloid-silk fibroin bioconjugate by the protein in situ redox technique at room temperature.
Source: Royal Society of Chemistry journal article supplement (doi:10.1039/b108013j), 2001-11-15
Supplement: b108013j.doc [file b108013j.doc]

**
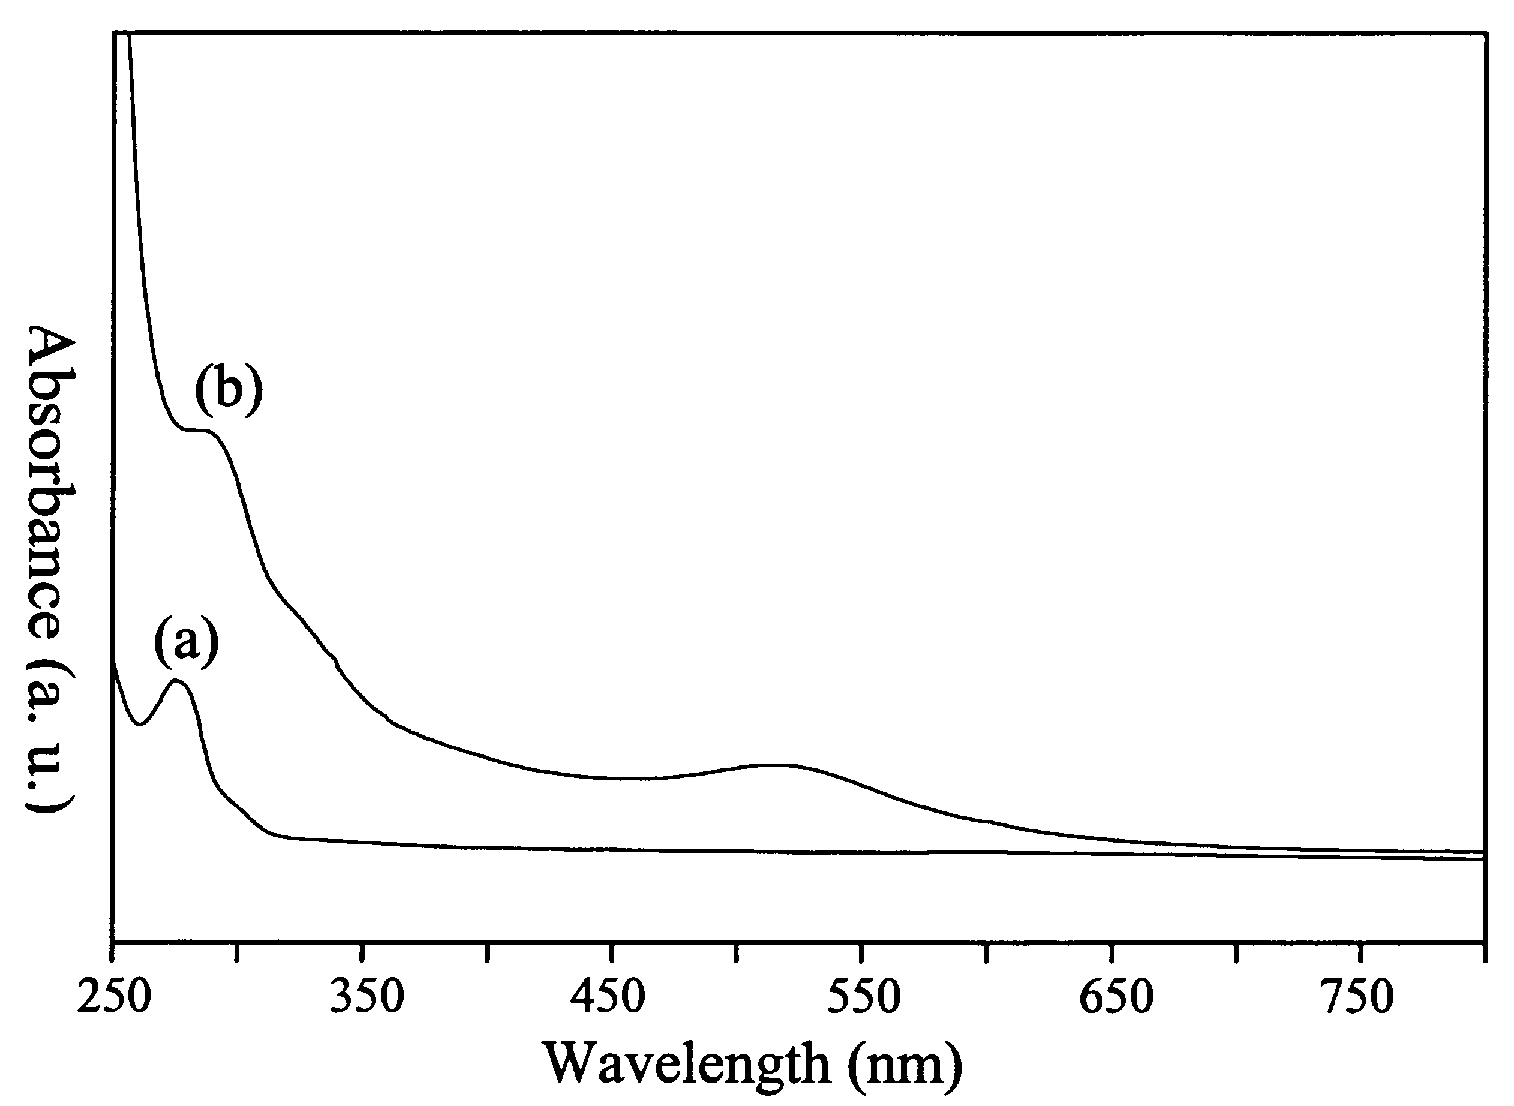
**

**Fig. S1** UV-vis absorption spectra of aqueous solutions of the pure SF (a) and the core-shell nanostructured Au colloid-SF bioconjugate (b) produced by the present protein *in situ* redox technique at room temperature.

Preparation of the silk fibroin (SF) solution**:** the cocoon shell of *Bombyx mori* was boiled with marseilles soap in a ratio of 1:50 for 1 h in a bath, and then boiled for another hour after changing the solution. The picrocarmine solution was then examined to ensure the sericin protein was removed completely. The solution was then soaked for 10 min with 0.05 wt% Na2CO3, and dried after washing fully with water. Finally, the pure SF was obtained after the fiber had been extracted with diethyl ether in a Soxhlet extractor for 48 h to remove any waxy substances. To obtain an aqueous solution of the SF, 2 g of the SF was dissolved into 200 ml of a solution consisting of H2O, ethanol and CaCl2 (mol ratio, 8:2:1) under stirring for 4 h at room temperature. The resulting SF solution was put into cellulose dialyzer tubing to remove CaCl2, and then stored at 4 oC for further experimentation.
